# Supplementary material
Source: MDPI journal article supplement (https://www.mdpi.com/2072-4292/1/4/731)
Supplement: s1 [file s1]

Correction

**Correction: Shorter, N. *et al.* Automatic Vegetation Identification and Building Detection from A Single Nadir Aerial Image. *Remote Sens.* 2009, 1, 731-757**

**Nicholas Shorter \* and Takis Kasparis**

School of Electrical Engineering and Computer Science (EECS), University of Central Florida (UCF), 4000 Central Florida Blvd., Orlando, FL 32816-2362, USA; E-Mail: kasparis@ucf.edu

\* Author to whom correspondence should be addressed; E-Mail: nshorter@nshorter.com; Tel.: +1-407-230-0452; Fax: +1-407-823-5835.

Received: 30 July 2010 / Published: 11 August 2010

---

Equation (5) is incorrect in our paper published in *Remote Sensing* in 2009 [1]. The correct equation is as follows:

$$\psi_s(i, j) = \frac{4}{\pi} \cdot \arctan\left(\frac{I(i, j, r) - 1}{I(i, j, r) + 1}\right) \quad \forall i, \forall j \quad i \in \{1, \dots, R\}, j \in \{1, \dots, C\} \quad (1)$$

## References

1. Shorter, N.; Kasparis, T. Automatic vegetation identification and building detection from a single nadir aerial image. *Remote Sens.* **2009**, *1*, 731-757.

© 2010 by the authors; licensee MDPI, Basel, Switzerland. This article is an Open Access article distributed under the terms and conditions of the Creative Commons Attribution license (<http://creativecommons.org/licenses/by/3.0/>).
